# Supplementary material
Source: Springer Nature journal article supplement (https://www.springermedizin.de/resource/supplementary/12880_2006_9_MOESM2_ESM.pdf/9450402)
Supplement: MOESM2 [file 9450402]

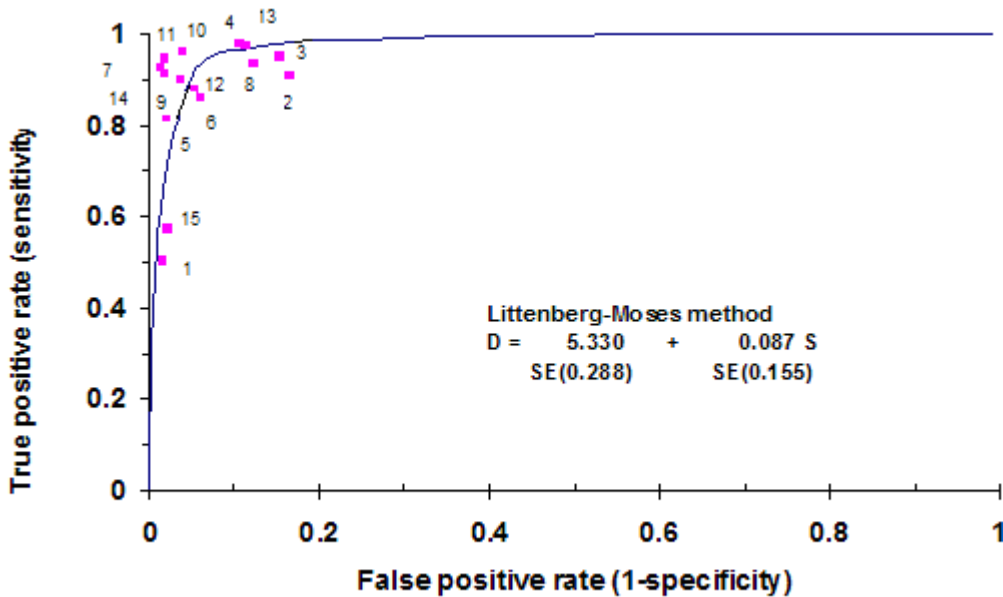

- 1 Angulo [11]
- 2 Calvo [13]
- 3 Chan [14]
- 4 Demartines [15]
- 5 Guibaud [18]
- 6 Holzknrecht [20]
- 7 Laokpessi [21]
- 8 Regan [26]
- 9 Reinhold [27]
- 10 Soto [29]
- 11 Soto [30]
- 12 Stiris [31]
- 13 Taylor [33]
- 14 Varghese [35]
- 15 Zidi [36]
